# Supplementary figures and images for: The Effect of FATP1 on Adipocyte Differentiation in Qinchuan Beef Cattle
Source: MDPI journal article supplement (doi:10.3390/ani11102789), 2021-09-24

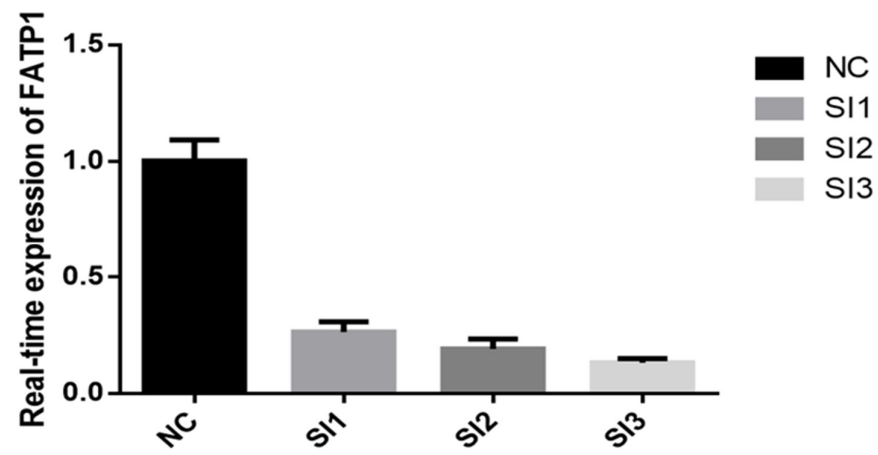

**Figure S1.** *FATP1* mRNA levels in adipocytes infected with siRNA1/ siRNA2/ siRNA3/ and si-NC (n=3).

Supplement: s1 [file s1]
